# Supplementary material
Source: Springer Nature journal article supplement (https://www.springermedizin.de/resource/supplementary/13063_2008_284_MOESM5_ESM.pdf/9622460)
Supplement: MOESM5 [file 9622460]

Table 1: Mean and standard deviation of OM score, H<sub>2</sub>S, CH<sub>3</sub>CH and (CH<sub>3</sub>)<sub>2</sub>S

|                                                |                    |      | baseline | just after rinsing | time(min.) |        |        |        |        |        |        |        |
|------------------------------------------------|--------------------|------|----------|--------------------|------------|--------|--------|--------|--------|--------|--------|--------|
|                                                |                    |      |          |                    | 30         | 60     | 90     | 120    | 150    | 180    | 210    | 240    |
| OM score                                       | experimental group | mean | 2.10     | 1.23**             | 1.20**     | 1.37** | 1.33** | 1.40** | 1.46** | 1.43** | 1.47** | 1.50** |
|                                                |                    | (SD) | (0.51)   | (0.32)             | (0.32)     | (0.40) | (0.45) | (0.39) | (0.32) | (0.42) | (0.48) | (0.42) |
|                                                | control group      | mean | 1.87     | 1.70               | 1.90       | 1.90   | 2.00   | 2.00   | 2.11   | 2.00   | 2.03   | 1.93   |
|                                                |                    | (SD) | (0.61)   | (0.53)             | (0.43)     | (0.60) | (0.57) | (0.53) | (0.60) | (0.50) | (0.44) | (0.50) |
| H <sub>2</sub> S<br>(ng/10ml)                  | experimental group | mean | 5.31     | 0.12**             | 0.88**     | 1.62** | 1.17** | 1.29** | 1.18** | 1.72*  | 1.67** | 1.84*  |
|                                                |                    | (SD) | (4.89)   | (0.28)             | (1.28)     | (2.43) | (1.11) | (1.12) | (0.84) | (1.39) | (1.05) | (1.62) |
|                                                | control group      | mean | 4.88     | 3.70               | 3.30       | 3.34   | 3.74   | 4.79   | 6.45   | 4.99   | 4.49   | 6.77   |
|                                                |                    | (SD) | (6.61)   | (7.24)             | (3.83)     | (3.36) | (3.89) | (4.67) | (8.36) | (4.65) | (4.65) | (5.96) |
| CH <sub>3</sub> SH<br>(ng/10ml)                | experimental group | mean | 1.42     | 0.04**             | 0.14**     | 0.28** | 0.27** | 0.27** | 0.21** | 0.32*  | 0.30*  | 0.30*  |
|                                                |                    | (SD) | (1.48)   | (0.08)             | (0.20)     | (0.31) | (0.23) | (0.24) | (0.17) | (0.28) | (0.23) | (0.28) |
|                                                | control group      | mean | 1.21     | 0.61*              | 0.80       | 0.94   | 1.07   | 1.40   | 1.78   | 1.58   | 1.45   | 2.03*  |
|                                                |                    | (SD) | (1.45)   | (0.81)             | (0.70)     | (0.79) | (0.93) | (1.28) | (1.76) | (1.49) | (1.50) | (1.51) |
| (CH <sub>3</sub> ) <sub>2</sub> S<br>(ng/10ml) | experimental group | mean | 0.40     | 0.02**             | 0.05**     | 0.10** | 0.09** | 0.12** | 0.10** | 0.12** | 0.13** | 0.10** |
|                                                |                    | (SD) | (0.27)   | (0.06)             | (0.20)     | (0.16) | (0.13) | (0.14) | (0.12) | (0.16) | (0.12) | (0.12) |
|                                                | control group      | mean | 0.33     | 0.22*              | 0.28       | 0.29   | 0.34*  | 0.46   | 0.52   | 0.43   | 0.42   | 0.53** |
|                                                |                    | (SD) | (0.33)   | (0.21)             | (0.26)     | (0.25) | (0.30) | (0.35) | (0.39) | (0.40) | (0.38) | (0.40) |

OM, organoleptic measurement; H<sub>2</sub>S, hydrogen sulfide; CH<sub>3</sub>SH, methyl mercaptan; (CH<sub>3</sub>)<sub>2</sub>S, dimethyl sulfide; SD, standard deviation.

\*, p<0.05; \*\*, p<0.01 comparison with the baseline (before rinsing) value. Paired t test was used for statistical analysis.
